# Supplementary material for: Association between Food Sources of Free Sugars and Weight Status among Children and Adolescents in Japan: The 2016 National Health and Nutrition Survey, Japan
Source: MDPI journal article supplement (doi:10.3390/nu14173659), 2022-09-04
Supplement: s1 [file s1]

**Supplemental Table S1.** BMI z-scores of Japanese children and adolescents aged 2-19 years with measured anthropometric data according to free sugars intake: the 2016 National Health and Nutrition Survey, Japan <sup>1</sup>.

|                       | Males (n = 776)      |        |                       |        |                      |        |                       |        |                |      | Females (n = 736)    |        |                       |        |                      |        |                       |        |                |  |
|-----------------------|----------------------|--------|-----------------------|--------|----------------------|--------|-----------------------|--------|----------------|------|----------------------|--------|-----------------------|--------|----------------------|--------|-----------------------|--------|----------------|--|
|                       | First <sup>2,3</sup> |        | Second <sup>2,3</sup> |        | Third <sup>2,3</sup> |        | Fourth <sup>2,3</sup> |        | P <sup>4</sup> |      | First <sup>2,3</sup> |        | Second <sup>2,3</sup> |        | Third <sup>2,3</sup> |        | Fourth <sup>2,3</sup> |        | P <sup>4</sup> |  |
| FS <sub>total</sub>   |                      |        |                       |        |                      |        |                       |        |                |      |                      |        |                       |        |                      |        |                       |        |                |  |
| n (%)                 | 194                  | (25.0) | 194                   | (25.0) | 194                  | (25.0) | 194                   | (25.0) |                |      | 184                  | (25.0) | 184                   | (25.0) | 184                  | (25.0) | 184                   | (25.0) |                |  |
| Intake (median, %E)   | 1.8                  |        | 3.9                   |        | 6.0                  |        | 10.7                  |        |                |      | 1.9                  |        | 4.4                   |        | 7.0                  |        | 11.7                  |        |                |  |
| Model 1 <sup>5</sup>  | 0.07                 | 0.08   | -0.04                 | 0.08   | -0.07                | 0.08   | -0.01                 | 0.08   | 0.64           | 0.06 | 0.07                 | 0.05   | 0.07                  | -0.08  | 0.07                 | -0.09  | -0.09                 | 0.07   |                |  |
| Model 2 <sup>6</sup>  | 0.05                 | 0.08   | -0.03                 | 0.08   | -0.07                | 0.08   | 0.00                  | 0.08   | 0.86           | 0.06 | 0.07                 | 0.05   | 0.07                  | -0.08  | 0.07                 | -0.09  | -0.09                 | 0.08   |                |  |
| Model 3 <sup>7</sup>  | 0.07                 | 0.08   | -0.03                 | 0.08   | -0.09                | 0.08   | 0.01                  | 0.08   | 0.83           | 0.07 | 0.07                 | 0.05   | 0.07                  | -0.08  | 0.07                 | -0.09  | -0.09                 | 0.05   |                |  |
| FS <sub>solids</sub>  |                      |        |                       |        |                      |        |                       |        |                |      |                      |        |                       |        |                      |        |                       |        |                |  |
| n (%)                 | 194                  | (25.0) | 194                   | (25.0) | 194                  | (25.0) | 194                   | (25.0) |                |      | 184                  | (25.0) | 184                   | (25.0) | 184                  | (25.0) | 184                   | (25.0) |                |  |
| Intake (median, %E)   | 1.4                  |        | 3.0                   |        | 4.5                  |        | 7.5                   |        |                |      | 1.5                  |        | 3.3                   |        | 5.2                  |        | 8.7                   |        |                |  |
| Model 1 <sup>5</sup>  | 0.08                 | 0.08   | 0.01                  | 0.08   | -0.07                | 0.08   | -0.06                 | 0.08   | 0.18           | 0.15 | 0.07                 | -0.08  | 0.07                  | -0.06  | 0.07                 | -0.07  | -0.07                 | 0.08   |                |  |
| Model 2 <sup>6</sup>  | 0.07                 | 0.08   | 0.00                  | 0.08   | -0.07                | 0.08   | -0.06                 | 0.08   | 0.24           | 0.14 | 0.07                 | -0.08  | 0.07                  | -0.06  | 0.07                 | -0.06  | -0.06                 | 0.08   |                |  |
| Model 3 <sup>7</sup>  | 0.09                 | 0.08   | 0.00                  | 0.08   | -0.08                | 0.08   | -0.06                 | 0.08   | 0.18           | 0.15 | 0.07                 | -0.08  | 0.07                  | -0.06  | 0.07                 | -0.07  | -0.07                 | 0.06   |                |  |
| FS <sub>liquids</sub> |                      |        |                       |        |                      |        |                       |        |                |      |                      |        |                       |        |                      |        |                       |        |                |  |
| n (%)                 | 466                  | (60.1) | 103                   | (13.3) | 104                  | (13.4) | 103                   | (13.3) |                |      | 450                  | (61.1) | 95                    | (12.9) | 96                   | (13.0) | 95                    | (12.9) |                |  |
| Intake (median, %E)   | 0                    |        | 1.2                   |        | 2.9                  |        | 6.6                   |        |                |      | 0                    |        | 1.7                   |        | 3.2                  |        | 6.7                   |        |                |  |
| Model 1 <sup>5</sup>  | -0.01                | 0.05   | 0.04                  | 0.11   | -0.09                | 0.11   | 0.01                  | 0.11   | 0.99           | 0.03 | 0.04                 | -0.03  | 0.09                  | -0.14  | 0.09                 | -0.06  | -0.06                 | 0.22   |                |  |
| Model 2 <sup>6</sup>  | -0.01                | 0.05   | 0.03                  | 0.11   | -0.09                | 0.11   | 0.02                  | 0.11   | 0.92           | 0.02 | 0.04                 | -0.03  | 0.09                  | -0.14  | 0.09                 | -0.05  | -0.05                 | 0.24   |                |  |
| Model 3 <sup>7</sup>  | -0.005               | 0.05   | 0.004                 | 0.11   | -0.11                | 0.11   | 0.04                  | 0.11   | 0.90           | 0.03 | 0.04                 | -0.06  | 0.09                  | -0.14  | 0.09                 | -0.06  | -0.06                 | 0.19   |                |  |

All values are adjusted means and standard errors unless otherwise indicated.

FS<sub>total</sub>, total free sugars; FS<sub>solids</sub>, free sugars from solid foods; FS<sub>liquids</sub>, free sugars from beverages; BMI, body mass index; %E, percent of energy

<sup>1</sup> BMI z-scores were estimated based on BMI (calculated as kg/m<sup>2</sup>) using the International Obesity Task Force age- and sex-specific equations.

<sup>2</sup> For FS<sub>total</sub> and FS<sub>solids</sub>, the first to fourth categories consist of quartiles of participants. For FS<sub>liquids</sub>, the first category includes non-consumers, while the second to fourth categories consist of tertiles of consumers.

<sup>3</sup> Dunnett's test was conducted using the first category as a reference. There was no difference between categories (P < 0.05).

<sup>4</sup> A linear regression was conducted with the median value of each category of free sugars intake.

<sup>5</sup> Adjustment was made for age (continuous).

<sup>6</sup> Further adjustment was made for intakes of fat (%E, continuous) and dietary fibre (g/4184 kJ, continuous).

<sup>7</sup> Further adjustment was made for energy intake (kJ, continuous).

**Supplemental Table S2.** ORs (95% CIs) for overweight and obese Japanese children and adolescents aged 2-19 years with measured anthropometric data according to free sugars intake: the 2016 National Health and Nutrition Survey, Japan <sup>1</sup>.

|                                                 | Males (n = 776)      |                       |              |                      |              |                       |              |                |  |                      | Females (n = 736)     |              |                      |              |                       |              |                |  |  |  |
|-------------------------------------------------|----------------------|-----------------------|--------------|----------------------|--------------|-----------------------|--------------|----------------|--|----------------------|-----------------------|--------------|----------------------|--------------|-----------------------|--------------|----------------|--|--|--|
|                                                 | First <sup>2,3</sup> | Second <sup>2,3</sup> |              | Third <sup>2,3</sup> |              | Fourth <sup>2,3</sup> |              | P <sup>4</sup> |  | First <sup>2,3</sup> | Second <sup>2,3</sup> |              | Third <sup>2,3</sup> |              | Fourth <sup>2,3</sup> |              | P <sup>4</sup> |  |  |  |
| FS <sub>total</sub><br>Intake<br>(median, %E)   | 1.8                  | 3.9                   |              | 6.0                  |              | 10.7                  |              |                |  | 1.9                  | 4.4                   |              | 7.0                  |              | 11.7                  |              |                |  |  |  |
| Overweight and obese (%)                        | 11.9                 | 12.4                  |              | 7.7                  |              | 10.8                  |              |                |  | 10.3                 | 5.9                   |              | 7.6                  |              | 5.4                   |              |                |  |  |  |
| Model 1 <sup>5</sup>                            | 1.00                 | 1.19                  | (0.64, 2.22) | 0.70                 | (0.35, 1.40) | 1.06                  | (0.56, 2.02) | 0.91           |  | 1.00                 | 0.54                  | (0.25, 1.18) | 0.70                 | (0.34, 1.44) | 0.48                  | (0.22, 1.07) | 0.12           |  |  |  |
| Model 2 <sup>6</sup>                            | 1.00                 | 1.29                  | (0.69, 2.42) | 0.73                 | (0.36, 1.46) | 1.18                  | (0.61, 2.28) | 0.91           |  | 1.00                 | 0.55                  | (0.25, 1.20) | 0.69                 | (0.33, 1.43) | 0.46                  | (0.20, 1.05) | 0.10           |  |  |  |
| Model 3 <sup>7</sup>                            | 1.00                 | 1.29                  | (0.69, 2.42) | 0.73                 | (0.36, 1.46) | 1.18                  | (0.61, 2.28) | 0.90           |  | 1.00                 | 0.53                  | (0.24, 1.15) | 0.66                 | (0.32, 1.38) | 0.44                  | (0.19, 1.01) | 0.09           |  |  |  |
| FS <sub>solids</sub><br>Intake<br>(median, %E)  | 1.4                  | 3.0                   |              | 4.5                  |              | 7.5                   |              |                |  | 1.5                  | 3.3                   |              | 5.2                  |              | 8.7                   |              |                |  |  |  |
| Overweight and obese (%)                        | 10.8                 | 14.4                  |              | 9.3                  |              | 8.3                   |              |                |  | 11.4                 | 5.4                   |              | 4.9                  |              | 7.6                   |              |                |  |  |  |
| Model 1 <sup>5</sup>                            | 1.00                 | 1.49                  | (0.81, 2.74) | 0.92                 | (0.47, 1.81) | 0.86                  | (0.43, 1.72) | 0.35           |  | 1.00                 | 0.44                  | (0.20, 0.97) | 0.39                 | (0.18, 0.89) | 0.62                  | (0.30, 1.27) | 0.29           |  |  |  |
| Model 2 <sup>6</sup>                            | 1.00                 | 1.53                  | (0.83, 2.83) | 0.97                 | (0.50, 1.91) | 0.92                  | (0.46, 1.86) | 0.48           |  | 1.00                 | 0.46                  | (0.21, 1.01) | 0.40                 | (0.18, 0.90) | 0.62                  | (0.30, 1.29) | 0.28           |  |  |  |
| Model 3 <sup>7</sup>                            | 1.00                 | 1.55                  | (0.83, 2.87) | 0.98                 | (0.50, 1.94) | 0.93                  | (0.46, 1.88) | 0.49           |  | 1.00                 | 0.45                  | (0.21, 0.99) | 0.39                 | (0.17, 0.88) | 0.61                  | (0.29, 1.26) | 0.26           |  |  |  |
| FS <sub>liquids</sub><br>Intake<br>(median, %E) | 0                    | 1.2                   |              | 2.9                  |              | 6.6                   |              |                |  | 0                    | 1.7                   |              | 3.2                  |              | 6.7                   |              |                |  |  |  |
| Overweight and obese (%)                        | 10.9                 | 10.7                  |              | 5.8                  |              | 14.6                  |              |                |  | 8.4                  | 7.4                   |              | 5.2                  |              | 4.2                   |              |                |  |  |  |
| Model 1 <sup>5</sup>                            | 1.00                 | 1.00                  | (0.50, 2.00) | 0.52                 | (0.22, 1.25) | 1.47                  | (0.79, 2.75) | 0.43           |  | 1.00                 | 0.86                  | (0.37, 1.98) | 0.58                 | (0.22, 1.53) | 0.47                  | (0.16, 1.34) | 0.10           |  |  |  |
| Model 2 <sup>6</sup>                            | 1.00                 | 0.95                  | (0.47, 1.91) | 0.52                 | (0.21, 1.26) | 1.53                  | (0.80, 2.91) | 0.37           |  | 1.00                 | 0.83                  | (0.36, 1.92) | 0.58                 | (0.22, 1.51) | 0.43                  | (0.15, 1.25) | 0.07           |  |  |  |
| Model 3 <sup>7</sup>                            | 1.00                 | 0.95                  | (0.47, 1.92) | 0.52                 | (0.21, 1.26) | 1.53                  | (0.80, 2.92) | 0.37           |  | 1.00                 | 0.78                  | (0.33, 1.82) | 0.57                 | (0.22, 1.49) | 0.42                  | (0.14, 1.23) | 0.07           |  |  |  |

ORs, odds ratios; CIs, confidence intervals %E, FS<sub>total</sub>, total free sugars; FS<sub>solids</sub>, free sugars from solid foods; FS<sub>liquids</sub>, free sugars from beverages; BMI, body mass index; %E, percent of energy

<sup>1</sup> Prevalence of overweight and obesity was estimated according to the International Obesity Task Force age- and sex-specific BMI (calculated as kg/m<sup>2</sup>) cut offs, which correspond to an adult BMI of ≥25 kg/m<sup>2</sup>, for subjects aged <18 years or based on BMI cut offs of ≥25 kg/m<sup>2</sup> for subjects aged 18-19 years.

<sup>2</sup> For FS<sub>total</sub> and FS<sub>solids</sub>, the first to fourth categories consist of quartiles of participants. For FS<sub>liquids</sub>, the first category includes non-consumers, while the second to fourth categories consist of tertiles of consumers.

<sup>3</sup> ORs and 95% CIs were estimated by a logistic regression using the first category as a reference.

<sup>4</sup> A logistic regression was conducted using the median value of each category of free sugars intake as a continuous variable

<sup>5</sup> Adjustment was made for age (continuous).

<sup>6</sup> Further adjustment was made for intakes of fat (%E, continuous) and dietary fibre (g/4184 kJ, continuous).

<sup>7</sup> Further adjustment was made for energy intake (kJ, continuous).
